# Supplementary material
Source: PubMed Central journal article supplement (PMC4662649)
Supplement: NIHMS685721-supplement-01.pdf [file NIHMS685721-supplement-01.pdf]

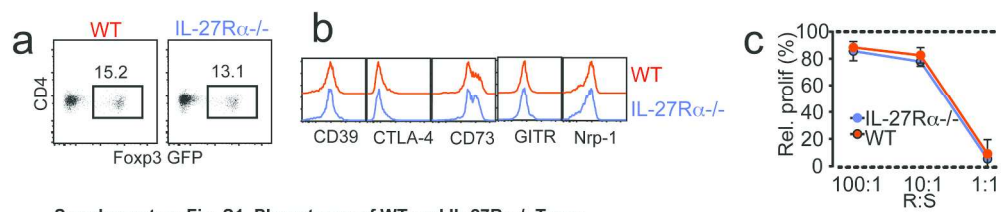

**Supplementary Fig. S1. Phenotypes of WT and IL-27R $\alpha$ <sup>-/-</sup> Tregs.**

(a) nTreg development was examined in WT Foxp3.GFP and IL-27R $\alpha$ <sup>-/-</sup> Foxp3.GFP mice. (b) Surface expression of the listed molecules was determined by flow analysis. Histograms shown are CD25<sup>+</sup>CD4<sup>+</sup> gated cells. (c) Treg suppression was determined by in vitro suppression assay.

240x72mm (300 x 300 DPI)

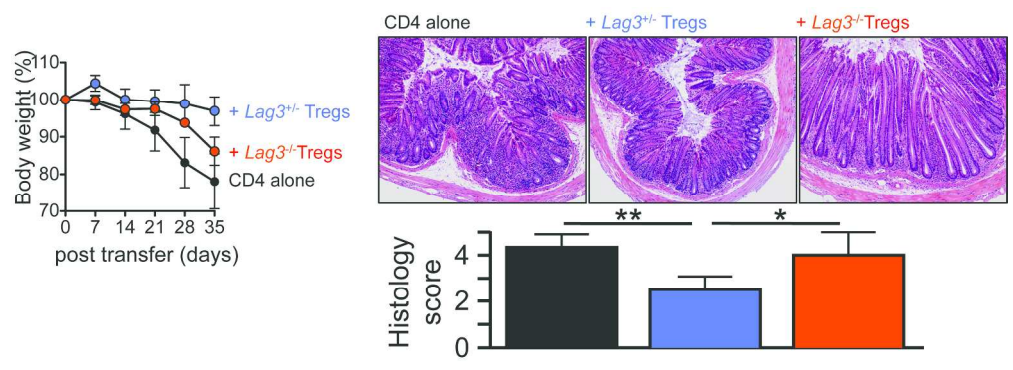

**Supplementary Fig. S2. *Lag3*<sup>-/-</sup> Tregs express impaired suppressive function.**  
Groups of *Rag1*<sup>-/-</sup> mice received naive CD4 T cells alone, together with *Lag3*<sup>+/-</sup> or with *Lag3*<sup>-/-</sup> Tregs. Body weight was weekly measured to monitor colitis development. Colonic inflammation was examined by H&E staining at 35 days post transfer.

231x108mm (300 x 300 DPI)
